# Supplementary material
Source: HighWire-hosted journal article supplement (https://www.cmaj.ca/content/suppl/2003/09/26/169.7.701)
Supplement: Q6.pdf [file Q6.pdf]

## **CMAJ - Canadian Medical Association Journal**

### Results from the CMA's 2003 Physician Resource Questionnaire

#### **Internet use by main location**

Considering all activities on the Internet, where do you spend the most time online?

|                 | <b>Number of respondents</b> | <b>Home</b> | <b>Office/clinical practice</b> | <b>Hospital</b> | <b>Other</b> | <b>No Response</b> | <b>Total</b> |
|-----------------|------------------------------|-------------|---------------------------------|-----------------|--------------|--------------------|--------------|
| <b>Overall</b>  | 1986                         | 73.1%       | 14.0%                           | 6.2%            | 0.7%         | 6.0%               | 100%         |
| <b>Female</b>   | 660                          | 75.0%       | 12.4%                           | 5.6%            | 1.1%         | 5.9%               | 100%         |
| <b>Male</b>     | 1326                         | 72.1%       | 14.9%                           | 6.5%            | 0.5%         | 6.0%               | 100%         |
| <b>&lt; 35</b>  | 205                          | 73.2%       | 11.7%                           | 8.8%            | 0.5%         | 5.9%               | 100%         |
| <b>35 - 44</b>  | 579                          | 73.4%       | 14.5%                           | 6.9%            | 0.3%         | 4.8%               | 100%         |
| <b>45 - 54</b>  | 662                          | 72.2%       | 14.8%                           | 5.7%            | 0.5%         | 6.8%               | 100%         |
| <b>55 - 64</b>  | 381                          | 72.7%       | 13.6%                           | 6.0%            | 1.8%         | 5.8%               | 100%         |
| <b>65+</b>      | 159                          | 76.1%       | 13.2%                           | 2.5%            | 0.6%         | 7.5%               | 100%         |
| <b>GP/FP</b>    | 1063                         | 79.0%       | 11.3%                           | 3.0%            | 0.8%         | 5.9%               | 100%         |
| <b>MedSpec</b>  | 680                          | 62.9%       | 19.7%                           | 10.7%           | 0.4%         | 6.2%               | 100%         |
| <b>SurgSpec</b> | 243                          | 75.3%       | 10.3%                           | 7.4%            | 1.2%         | 5.8%               | 100%         |
| <b>Rural</b>    | 172                          | 76.7%       | 9.9%                            | 4.7%            | 0.0%         | 8.7%               | 100%         |
| <b>Urban</b>    | 1814                         | 72.7%       | 14.4%                           | 6.3%            | 0.8%         | 5.7%               | 100%         |

Note: Includes only those who say they personally use the Internet
